# Supplementary material for: A Stable Rechargeable Aqueous Zn–Air Battery Enabled by Heterogeneous MoS2 Cathode Catalysts
Source: Nanomaterials (Basel). 2022 Nov 18;12(22):4069. doi: 10.3390/nano12224069 (PMC9698408; doi:10.3390/nano12224069)
Supplement: Supplementary file 1 [file nanomaterials-12-04069-s001.zip › nanomaterials-2027719-supplementary.pdf]

# A Stable Rechargeable Aqueous Zn–Air Battery Enabled by Heterogeneous MoS<sub>2</sub> Cathode Catalysts

Min Wang <sup>1</sup>, Xiaoxiao Huang <sup>2</sup>, Zhiqian Yu <sup>1</sup>, Pei Zhang <sup>3</sup>, Chunyang Zhai <sup>2,\*</sup>, Hucheng Song <sup>1,\*</sup>, Jun Xu <sup>1</sup> and Kunji Chen <sup>1</sup>

<sup>1</sup> National Laboratory of Solid State Microstructures, School of Electronics Science and Engineering, College of Engineering and Applied Sciences, Nanjing University, Nanjing 210093, China

<sup>2</sup> School of Materials Science and Chemical Engineering, Ningbo University, Ningbo 315211, China

<sup>3</sup> College of Electrical and Information Engineering, Zhengzhou University of Light Industry, Zhengzhou 450002, China

\* Correspondence: to: zhaichunyang@nbu.edu.cn (C.Z.); hcsong@nju.edu.cn (H.S.)

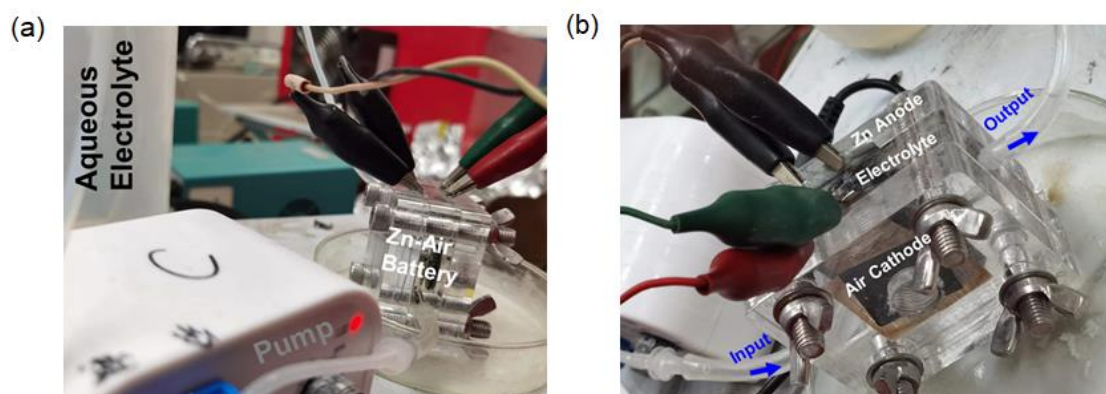

**Figure S1. Aqueous Zn-Air battery system.** (A) The photo of aqueous Zn-Air battery system that consists of aqueous electrolyte, pump and Zn-Air battery. (B) Photo of aqueous Zn-Air battery that consists of air cathode, aqueous and Zn-anode.

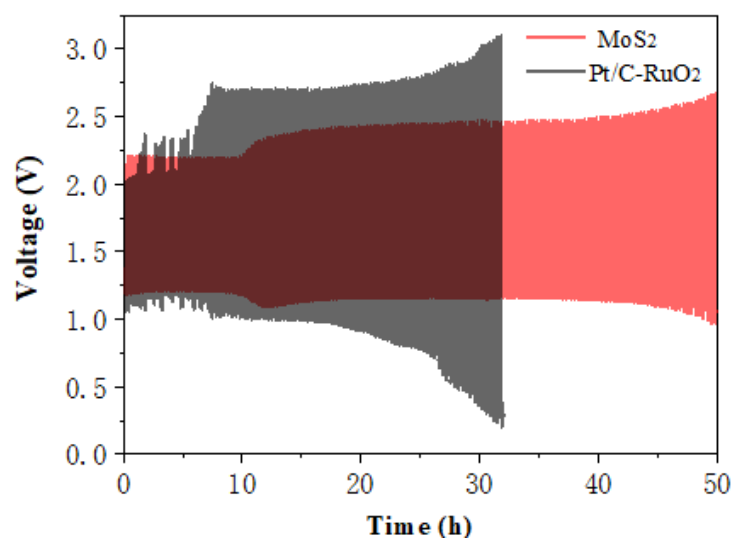

**Figure S2. Electrochemical cycle performance of aqueous Zn-Air batteries using the heterogeneous MoS<sub>2</sub> cathode catalyst and commercial Pt/C-RuO<sub>2</sub> cathode catalyst where the Zn-Air battery using the prepared MoS<sub>2</sub> cathode catalysts shows an excellent cycle stability than the Zn-Air battery using expensive Pt/C-RuO<sub>2</sub> cathode catalyst at a large current density of 5 mA cm<sup>-2</sup>. It indicates that the**

heterogeneous MoS<sub>2</sub> catalyst has better oxygen evolution and oxygen reduction catalytic activity, especially at operating current density, than commercial Pt/C-RuO<sub>2</sub> catalyst.

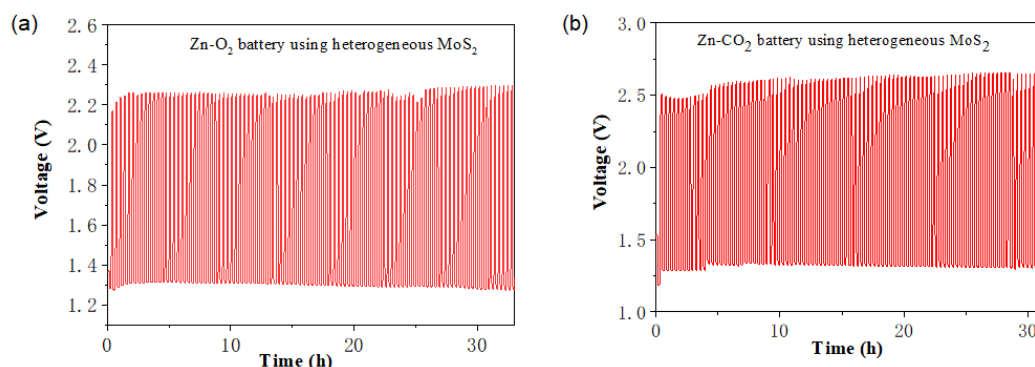

**Figure S3.** Electrochemical cycle performance of aqueous Zn-O<sub>2</sub> battery and Zn-CO<sub>2</sub> battery. (a) Voltage-time curves of the assembled aqueous Zn-O<sub>2</sub> battery using the heterogeneous MoS<sub>2</sub> catalyst that shows a stable cycle and less than 1.0 V potential gap (with a ~1.3V discharge potential and less than 2.3 V charge potential). (b) Voltage-time curves of the assembled aqueous Zn-O<sub>2</sub> battery using the heterogeneous MoS<sub>2</sub> catalyst that shows a stable cycle and ~1.35 V potential gap (with a ~1.25 V discharge potential and ~2.6 V charge potential).

**Table S1.** Comparison of electrochemical properties of Zn-Air batteries using MoS<sub>2</sub>-based catalysts.

| Performance<br>Materials                             | Capacity<br>[mAh g <sup>-1</sup> ] | Current density<br>[mA cm <sup>-2</sup> ] | Discharge voltage<br>[V] | Charge voltage<br>[V] | Voltage gap<br>[V] | Cycles/Hours    | Reference |
|------------------------------------------------------|------------------------------------|-------------------------------------------|--------------------------|-----------------------|--------------------|-----------------|-----------|
| MoS <sub>2</sub> /PTCDA                              | 330                                | 0.5                                       | 1.30                     | 1.88                  | 0.58               | 500 cycles/180h | This work |
|                                                      | 3300                               | 5                                         | 1.22                     | 2.23                  | 1.01               | 12 h            |           |
| MoS <sub>2</sub> on N-doped carbon                   | -                                  | 5                                         | 1.24                     | 1.99                  | 0.75               | 48 h            | 1         |
| Co <sub>9</sub> S <sub>8</sub> @MoS <sub>2</sub>     | -                                  | 10                                        | 1.25                     | 2.0                   | 0.75               | 120 cycles      | 2         |
| CoS <sub>2</sub> @MoS <sub>2</sub> @NiS <sub>2</sub> | 708                                | 10                                        | 1.12                     | 2.07                  | 0.95               | 40 h            | 3         |

The recent reported aqueous Zn-Air batteries are made of bifunctional MoS<sub>2</sub>-based catalysts that consist of MoS<sub>2</sub> catalyst and another catalyst with good OER catalytic activity such as N-doped carbon, Co<sub>9</sub>S<sub>8</sub> and CoS<sub>2</sub> and NiS<sub>2</sub> (see Ref.1 to Ref.3). The Zn-Air batteries using the heterogeneous MoS<sub>2</sub> catalysts show a long cycle stability (500 cycles, 180 h) and a low discharge voltage (1.88 V) and voltage gap (0.58 V) with a limited capacity of 330 mAh g<sup>-1</sup>. Even at a limited capacity of 3300 mAh g<sup>-1</sup>, the Zn-Air battery using the heterogeneous also shows an acceptable oxygen reduction catalytic and oxygen evolution activity (with 1.01 V voltage gap) than the reported bifunctional MoS<sub>2</sub>/N-doped carbon, Co<sub>9</sub>S<sub>8</sub>/MoS<sub>2</sub> and CoS<sub>2</sub>/MoS<sub>2</sub>/NiS<sub>2</sub> catalysts (with voltage gap from 0.75 V to 0.95 V, see Ref. 1 to Ref 3) with a limited capacity of ~700 mAh g<sup>-1</sup>.

## References

- [1] Adv. Funct. Mater. 2017, 27, 1702300
- [2] ACS Appl. Mater. Interfaces 2018, 10, 2, 1678–1689
- [3] Journal of Colloid and Interface Science, 2022(610), 653–662
